# Supplementary material for: Do smokers have greater risk of delayed and non-union after fracture, osteotomy and arthrodesis? A systematic review with meta-analysis
Source: PubMed Central journal article supplement — BMJ Open. 2016 Nov 14;6(11):e010303. doi: 10.1136/bmjopen-2015-010303 (PMC5129177; doi:10.1136/bmjopen-2015-010303), 2016-11-14
Supplement: bmjopen-2015-010303_Suppl-1.pdf [file bmjopen-2015-010303_Suppl-1.pdf]

## Web of Science™ search strategy

The Web of Science™ Core Collection from 1966 was searched by accessing the webpage via <http://wok.mimas.ac.uk/>

In the drop-down menu next to the word Search - Core Collection was selected

The search was conducted in May 2015, in the “Timespan” option manuscripts from 1966 was selected

All options relating to databases in the Core Collection were selected:

Web of Science Core Collection: Citation Indexes

Science Citation Index Expanded (SCI-EXPANDED) --1900-present

Social Sciences Citation Index (SSCI) --1956-present

Arts & Humanities Citation Index (A&HCI) --1975-present

Conference Proceedings Citation Index- Science (CPCI-S) --1990-present

Conference Proceedings Citation Index- Social Science & Humanities (CPCI-SSH) --1990-present

Book Citation Index– Science (BKCI-S) --2008-present

Book Citation Index– Social Sciences & Humanities (BKCI-SSH) --2008-present

Emerging Sources Citation Index (ESCI) --2015-present

Web of Science Core Collection: Chemical Indexes

Current Chemical Reactions (CCR-EXPANDED) --2008-present

(Includes Institut National de la Propriete Industrielle structure data back to 1840)

Index Chemicus (IC) --2008-present

The search strategy below was typed in the search box and “Topic” was selected from the drop-down menu

(smoking OR nicotine) AND (fracture OR arthrodesis OR arthrodeses OR osteotomy)
